# Supplementary material for: Polyphenols-Rich Fraction from Annona muricata Linn. Leaves Attenuates Oxidative and Inflammatory Responses in Neutrophils, Macrophages, and Experimental Lung Injury
Source: MDPI journal article supplement (doi:10.3390/pharmaceutics14061182), 2022-05-31
Supplement: s1 [file s1]

## High-Performance Liquid Chromatography - Electrospray Ionization-tandem Mass Spectrometry (HPLC-ESI/MS<sup>n</sup>)

The HPLC-ESI/MS<sup>n</sup> analysis was done on the Agilent Infinity 1260 coupled with a High-Resolution Mass Spectrometry Agilent 6520 B equipped with Quadrupole Time of Flight (QTOF) and electrospray ionization (ESI), according to the methodology described by Justino *et al.* 2018. The extract and fractions were injected on an Agilent Zorbax C18 column (100 mm x 2.1 mm, 2.7  $\mu$ m) at 1.0 mg/mL. The mobile phase consisted of water acidified with formic acid (0.1 % v/v) (A) and methanol (B), as follows: 2% B (0 min), 98% B (0-15 min); 98% B (15-17 min); 2% B (17-22 min) at a flow 0.4 mL/min. High purity nitrogen (N<sub>2</sub>) was used as drying gas (8.0 L/min) and as nebulizing gas at pressure of 58 PSI. The nebulizer temperature was 220 °C with a potential of 4.5 kV used on the capillary. The mass spectra of the ions (MS and MS<sup>2</sup>) were acquired in negative mode in the range of  $m/z$  100–1000. Different collision energies were adjusted automatically according to the precursor  $m/z$  to obtain the fragmentation spectra (MS<sup>2</sup>). Identification of compounds in each sample was performed by high resolution mass and fragmentation spectra MS<sup>2</sup> analysis, comparing with data from the literature and METLIN metabolite database.

## HPLC-ESI/MS<sup>n</sup> analysis

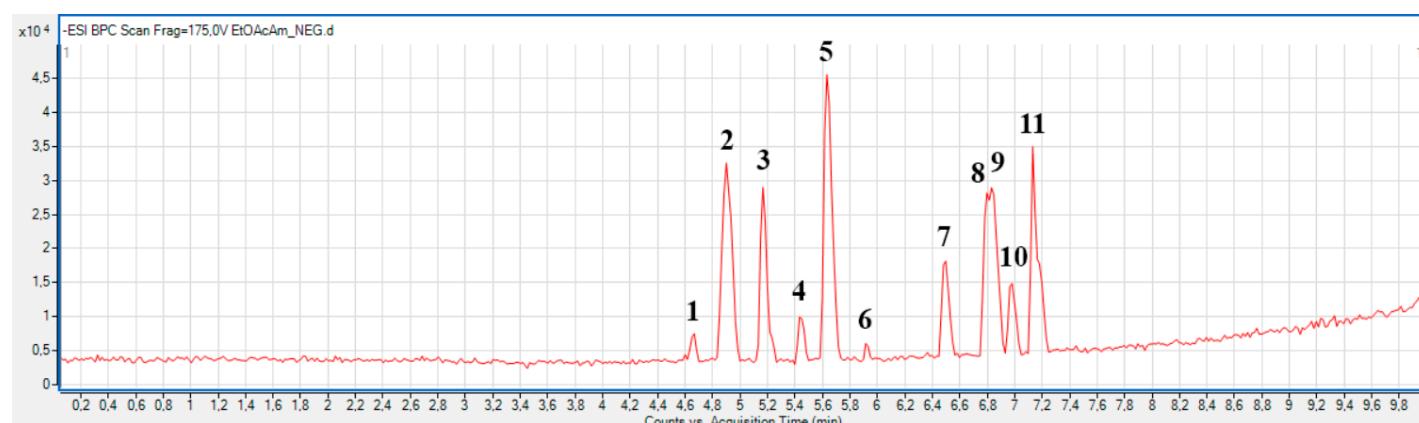

**Figure S1.** ESI-MS chromatogram of the ethyl acetate fraction (EtOAc.f) from *Annona muricata* leaf (negative mode). Numbers corresponding to major peaks and their respective compounds are shown in Supplementary Table S1.

| Peak | Compound (tentative identification) | Retention time (min) | Formula [M-H] <sup>-</sup>                                   | Mass calculated for [M-H] <sup>-</sup> | <i>m/z</i> of [M-H] <sup>-</sup> | Error (ppm) | <i>m/z</i> of fragments of [M-H] <sup>-</sup> | References                |
|------|-------------------------------------|----------------------|--------------------------------------------------------------|----------------------------------------|----------------------------------|-------------|-----------------------------------------------|---------------------------|
| 1    | Chlorogenic acid                    | 4.6                  | C <sub>16</sub> H <sub>17</sub> O <sub>9</sub> <sup>-</sup>  | 353.0878                               | 353.0864                         | 3.9         | 191, 161, 127, 125                            | doi: 10.3390/12030679     |
| 2    | Procyanidin B2                      | 4.8                  | C <sub>30</sub> H <sub>25</sub> O <sub>12</sub> <sup>-</sup> | 577.1351                               | 577.1340                         | -1.9        | 451, 407, 289, 203, 161, 125                  | Justino 2018              |
| 3    | Procyanidin C1                      | 5.2                  | C <sub>43</sub> H <sub>37</sub> O <sub>18</sub> <sup>-</sup> | 865.1985                               | 865.1985                         | 0.0         | 739, 577, 503, 451, 407, 289, 243, 125        | Justino 2018              |
| 4    | Caffeic acid                        | 5.4                  | C <sub>9</sub> H <sub>7</sub> O <sub>4</sub> <sup>-</sup>    | 179.0350                               | 179.0343                         | 3.9         | 176, 135                                      | doi: 10.3390/ijms13010260 |
| 5    | (Epi)catechin                       | 5.6                  | C <sub>15</sub> H <sub>13</sub> O <sub>6</sub> <sup>-</sup>  | 289.0718                               | 289.0711                         | -2.4        | 271, 245, 203, 179, 125                       | Justino 2018              |
| 6    | Quercetin-diglucoside               | 5.9                  | C <sub>27</sub> H <sub>29</sub> O <sub>17</sub> <sup>-</sup> | 625.1410                               | 625.1409                         | -0.1        | 463, 301, 300, 179                            | Justino 2018              |
| 7    | Quercetin-glucosyl-pentoside        | 6.5                  | C <sub>26</sub> H <sub>27</sub> O <sub>16</sub> <sup>-</sup> | 595.1305                               | 595.1304                         | -0.1        | 427, 301, 300, 271, 229, 179                  | Justino 2018              |
| 8    | Quercetin-glucoside                 | 6.8                  | C <sub>12</sub> H <sub>19</sub> O <sub>12</sub> <sup>-</sup> | 463.0877                               | 463.0875                         | -0.4        | 301, 300, 271, 125                            | Justino 2018              |
| 9    | Rutin                               | 6.8                  | C <sub>27</sub> H <sub>29</sub> O <sub>16</sub> <sup>-</sup> | 609.1461                               | 609.1462                         | 0.1         | 565, 463, 301, 300, 179                       | Justino 2018              |
| 10   | Quercetin-pentoside                 | 6.9                  | C <sub>20</sub> H <sub>17</sub> O <sub>11</sub> <sup>-</sup> | 433.0776                               | 433.0759                         | -3.9        | 301, 300, 271, 233, 165                       | Chen 2012.                |
| 11   | Quercetin-rhamnoside                | 7.2                  | C <sub>21</sub> H <sub>19</sub> O <sub>11</sub> <sup>-</sup> | 447.0933                               | 447.0911                         | -4.9        | 341, 301, 300, 285, 284                       | Justino 2018              |

**Table S1.** Compounds identified in the ethyl acetate fraction from *Annona muricata* leaf (EtOAc) by HPLC-ESI-MS/MS (negative mode).

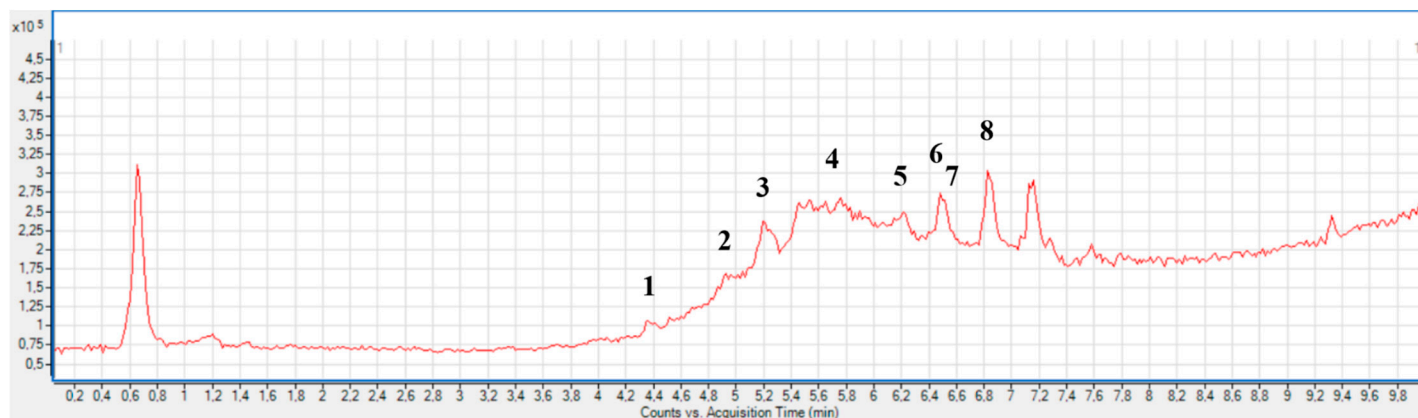

**Figure S2.** ESI-MS chromatogram of the n-butanol (BuOH.f) from *Annona muricata* leaf (negative mode). Numbers corresponding to major peaks and their respective compounds are shown in Table S2.

| Peak | Compound (tentative identification) | Retention time (min) | Formula [M-H] <sup>-</sup>                                   | Mass calculated for [M-H] <sup>-</sup> | <i>m/z</i> of [M-H] <sup>-</sup> | Error (ppm) | <i>m/z</i> of fragments of [M-H] <sup>-</sup> | References                      |
|------|-------------------------------------|----------------------|--------------------------------------------------------------|----------------------------------------|----------------------------------|-------------|-----------------------------------------------|---------------------------------|
| 1    | Chlorogenic acid                    | 4.4                  | C <sub>16</sub> H <sub>17</sub> O <sub>9</sub> <sup>-</sup>  | 353.0878                               | 353.0864                         | 3.9         | 191, 161, 127, 125                            | doi: 10.3390/12030679           |
| 2    | Procyanidin B2                      | 4.9                  | C <sub>30</sub> H <sub>25</sub> O <sub>12</sub> <sup>-</sup> | 577.1351                               | 577.1340                         | -1.9        | 451, 407, 289, 203, 161, 125                  | Justino 2018                    |
| 3    | Procyanidin C1                      | 5.2                  | C <sub>45</sub> H <sub>37</sub> O <sub>18</sub> <sup>-</sup> | 865.1985                               | 865.1985                         | 0.0         | 739, 577, 503, 451, 407, 289, 243, 125        | Justino 2018                    |
| 4    | (Epi)catechin                       | 5.6                  | C <sub>15</sub> H <sub>13</sub> O <sub>6</sub> <sup>-</sup>  | 289.0718                               | 289.0711                         | -2.4        | 271, 245, 203, 179, 125                       | Justino 2018                    |
| 5    | Quercetin-diglucoside               | 6.2                  | C <sub>27</sub> H <sub>29</sub> O <sub>17</sub> <sup>-</sup> | 625.1410                               | 625.1409                         | -0.1        | 463, 301, 300, 179                            | Justino 2018                    |
| 6    | Quercetin-glucosyl-pentoside        | 6.4                  | C <sub>26</sub> H <sub>27</sub> O <sub>16</sub> <sup>-</sup> | 595.1305                               | 595.1304                         | -0.1        | 427, 301, 300, 271, 229, 179                  | Justino 2018                    |
| 7    | Quercetin-xyloside-rutinoside       | 6.4                  | C <sub>32</sub> H <sub>37</sub> O <sub>20</sub> <sup>-</sup> | 741.1883                               | 741.1851                         | 4.31        | 653, 487, 301, 300                            | doi: 10.3390/molecules200611490 |
| 8    | Rutin                               | 6.8                  | C <sub>27</sub> H <sub>29</sub> O <sub>16</sub> <sup>-</sup> | 609.1461                               | 609.1462                         | 0.1         | 565, 463, 301, 300, 179                       | Justino 2018                    |

**Table S2.** Compounds identified in the n-butanol fraction (BuOH.f) from *Annona muricata* leaf (BuOH.f) by HPLC-ESI-MS/MS (negative mode).
